# Supplementary material for: Quench-Release-Based Fluorescent Immunosensor for the Rapid Detection of Tumor Necrosis Factor α
Source: PubMed Central journal article supplement — ACS Omega. 2021 Nov 11;6(46):31009–16. doi: 10.1021/acsomega.1c03941 (PMC8613823; doi:10.1021/acsomega.1c03941), 2021-11-11

---

## Supporting Information

# **Quench-release-based Fluorescent Immunosensor for the Rapid Detection of Tumor Necrosis Factor-alpha**

Haimei Li<sup>1</sup>, Xinyu Li<sup>1</sup>, Limei Chen<sup>1</sup>, Baowei Li<sup>1</sup>, Hang Dong<sup>2</sup>, Hongying Liu<sup>1</sup>,  
Xueying Yang<sup>1</sup>, Hiroshi Ueda<sup>3,4\*</sup> and Jinhua Dong<sup>1,3,4\*</sup>

*<sup>1</sup>Key Laboratory for Biological Medicine in Shandong Universities, Weifang Key Laboratory for Antibody Medicine, School of Life Science and Technology, Weifang Medical University, Weifang, 261053, China.*

*<sup>2</sup>School of Basic Medical Sciences, Peking University, Beijing 100191, China.*

*<sup>3</sup>World Research Hub Initiative, Institute of Innovative Research, Tokyo Institute of Technology, Yokohama 226-8503, Japan.*

*<sup>4</sup>Laboratory for Chemistry and Life Science, Institute of Innovative Research, Tokyo Institute of Technology, Yokohama, 226-8503 Japan*

\*Authors to whom correspondence should be addressed;

E-mail: dongjh@wfmcc.edu.cn (J.D.); ueda@res.titech.ac.jp (H.U.)

**Figure S1.** The amino acid sequence of UQ1H-Fab. V<sub>H</sub> and V<sub>L</sub> sequences are shown in magenta and blue, respectively. Tryptophan residues in V<sub>H</sub> and V<sub>L</sub> are shown in bold. Cysteine in cys-tag is underlined.

**UQ1H-Fab V<sub>H</sub>-C<sub>H</sub>1**

MAQIEVN**C**SNETGEVQLVESGGGLVQPGRSLRLSCAASGFTFDDYAMH**W**VRQAPGKGLE**W**VS  
 AIT**W**NSGHIDYAD**S**VEGRFTISRDN**A**KN**S**LYLQMN**S**LR**A**EDTAVYY**C**AKV**S**YLSTASSLDY**W**GQ  
 G**T**LV**T**V**S**SASTKGPSVFPLAPSSKSTSGGTAALGCLVKDYFPEPVTVSWNSGALTSGVHTFPAVL  
 QSSGLY**S**LS**S**V**T**VPSSSLGTQTYICNVNHKPSNTKVDK**K**VEPKSASAAHHHHHHHGAAEQKLIS  
 EEDLN**G**AA

**UQ1H-Fab Light Chain**

MDIQMTQSPSSLSASV**G**DRVTITCRASQ**G**IRNYLAWY**Q**Q**K**PGKAPKLLIYA**A**ASTLQSGVPSRFSG  
 S**G**SGTDFLT**I**SS**L**Q**P**EDVATYYC**Q**RYNRAPY**T**FG**Q**GT**K**LEIKRADAAPS**V**FIFPPSDEQLK**S**GTA  
 SVV**C**LLNNFYP**R**EAKVQWKVDNALQ**S**GN**S**Q**E**S**V**TEQ**D**SKDSTYLS**S**TLT**L**SKADY**E**KHKVYAC  
 EVTHQ**L**SSPVTK**S**FN**R**GEGGGSDYK**D**DDDK

**Figure S2.** Absorption spectra of QB1-TMR, QB2-TMR, QB1-ATTO and QB2-ATTO. For double labeled Q-body with TAMRA, a peak at 520 nm, for that with ATTO520, a peak at around 490 nm were also observed, which are derived from H-dimer, respectively.

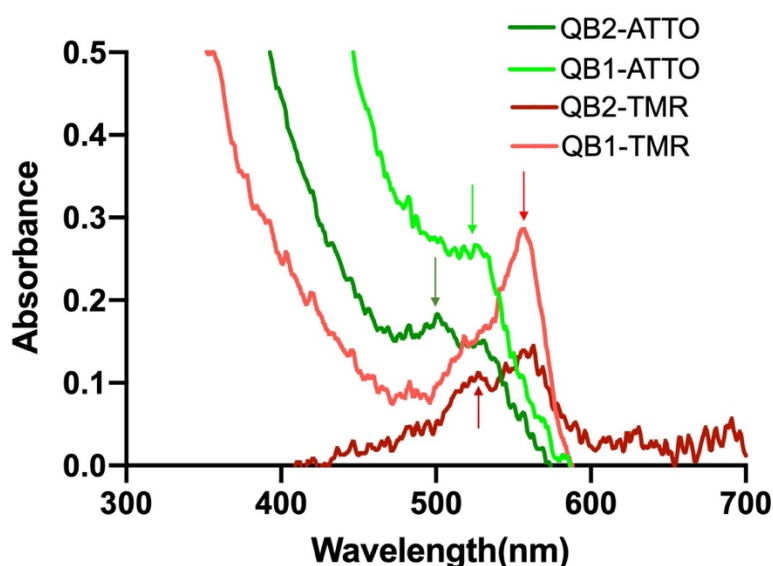

Supplement: ao1c03941_si_001.pdf [file ao1c03941_si_001.pdf]
